# Supplementary material for: Safer lithium–sulfur battery based on nonflammable electrolyte with sulfur composite cathode
Source: Royal Society of Chemistry journal article supplement (doi:10.1039/c7cc09942h), 2018-01-01
Supplement: c7cc09942h1.pdf [file c7cc09942h1.pdf]

## **Supporting Information**

### **Safer Lithium-Sulfur Battery Based on Nonflammable Electrolyte with Sulfur-Based Composite Cathode**

Huijun Yang, Qinyu Li, Cheng Guo, Ahmad Naveed, Jun Yang, Yanna Nuli and Jiulin Wang\*

## Experiment Selection

### Electrode Preparation

Poly(acrylonitrile) (PAN, weight-averaged molecular mass,  $M_w$  150000, Aldrich) element sulfur (Aladdin, AR 99.5%) were mixed homogeneously by ball milling at weight ratio 1:8 for 6h with isopropyl alcohol (Aladdin, ACS, 99.5%) as a dispersant. The mixed powder was dried to remove the solvent and then heated at 300°C for 450 minutes in nitrogen ( $N_2$ ) atmosphere. The collected black powder S@pPAN composite with sulfur content 44.5 wt% was ball milling before electrode preparation. The cathode was fabricated by mixing 80 wt% S@pPAN composite, 10 wt% conductive carbon (Super P), and 10 wt% carbonyl-beta-cyclodextrin as a binder<sup>1</sup>, then coating the slurry onto a piece of aluminium (Al) foil (with a carbon coating) and cutting the foil into small disks with a diameter of 12 mm after drying; the weight loads of the foil disks were ca. 1.0 mg cm<sup>-2</sup>.

### Electrolyte Preparation

The TEP solvent was purchased commercially from Aladdin Shanghai China. TEP used in this paper was purified with a re-distillation step under vacuum after its dehydration with calcium hydride ( $CaH_2$ , Aladdin, AR 95%) under the atmosphere of  $N_2$  for 6h at 100°C. After collected the distilled TEP, it should quickly transferred to argon-filled glove box. The contents ratio of TEP and FEC is calculated by volume. Four salts were used in this paper and all of them were purchased from Capchem. Co. Ltd. (battery grade). Lithium bis(oxalate)borate (LiBOB), Lithium Difluoro(oxalato)borate (LiODFB), Lithium nitrate ( $LiNO_3$ ), Lithium bis (fluorosulfonyl)imide (LiFSI), their concentration in mixture solvent was 1 mol/L.

### Electrochemical measurements

The CR2016-type Li-S coin cells were assembled in an argon (Ar)-filled glove box, pure lithium foil as anode, Celagrd2300 as separator, the S@pPAN electrode as cathode. To evaluate the electrochemical performance of electrolyte, different electrolyte was added into the coin cell. The galvanostatic discharge/charge tests were carried out at 1C on a LAND-CT 2001A Cell Test System (Wuhan, China) in the voltage range of 1.0~3.0 V (vs.  $Li/Li^+$ ). The rate performance of cells was evaluated using the same equipment at the discharged current density of 0.2C, 0.5C, 1C, 2C, 3C, 4C respectively.

### Physical characterizations

Ionic conductivity tests of the electrolyte were carried out with a DDS-307A conductivity meter at ambient temperature. The morphological changes of the sulfur cathode and Li anode were observed using SEM (FEI Nova Nano-scanning electron microscope). Before examination, the Li-S coin cells in the full-charged state after 100 cycles were disassembled in an argon-filled glove box and then obtained electrodes were rinsed with dimethylcarbonate (DMC) thoroughly. It is noted that the dried Li anode must be sealed in a Ar-filled container and transferred quickly into the SEM equipment to avoid oxidation. Surface composition of the electrode after 100 cycles in TEP-based electrolyte and standard electrolyte was analyzed by the X-ray photoelectron spectroscopy (XPS), using a Kratos Axis UltraDLD spectrometer (Kratos Analytical-A Shimadzu Group Company) with monochromatic Al K $\alpha$  source (1486.6 eV) under ultra-high vacuum. Also, the samples should be pretreated in the similar method to remove any electrolyte salt residuals.

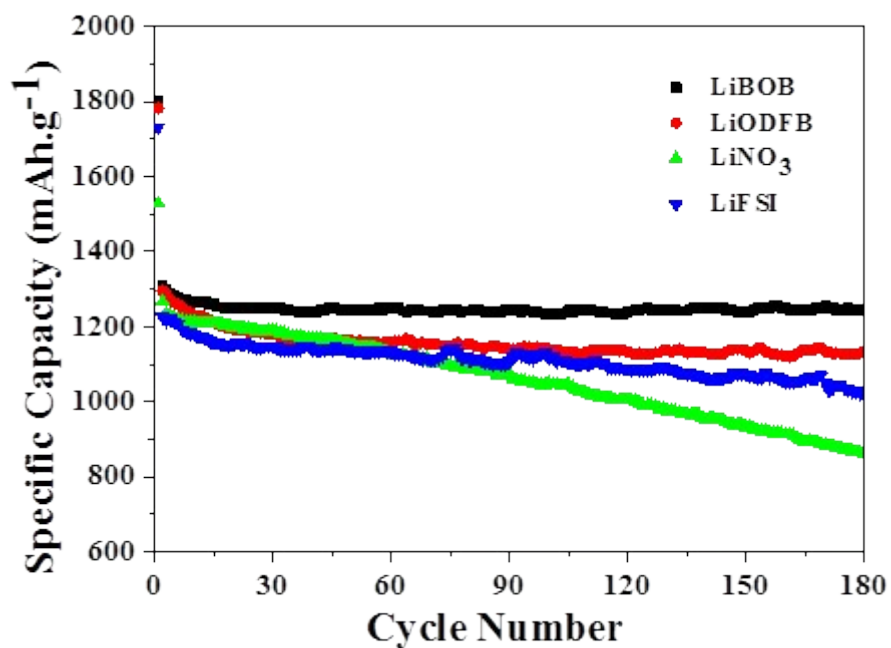

**Fig. S1** Cyclic performance of Li-S batteries at 1C in TEP:FEC (9:1, v/v) blending solvents with different salts.

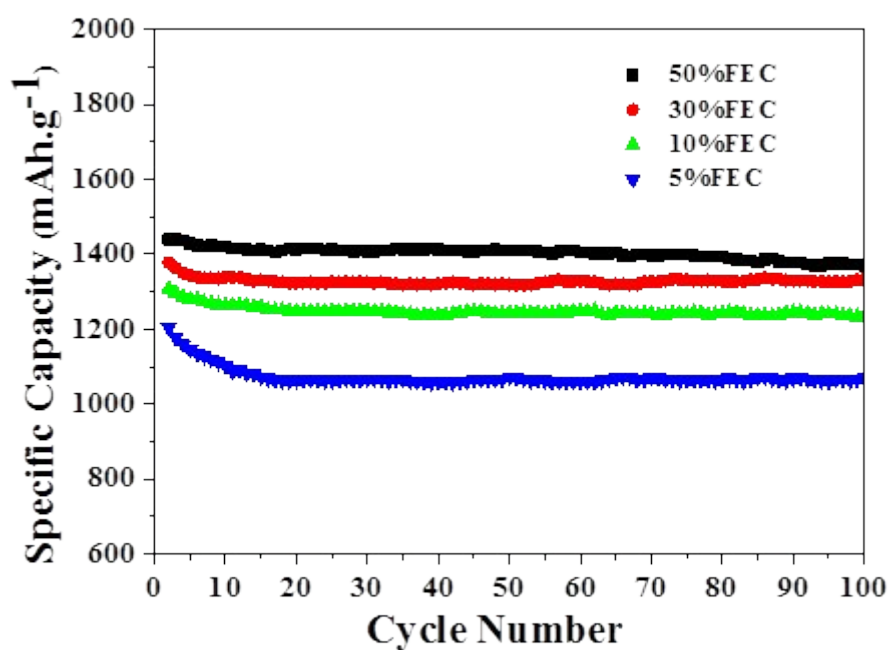

**Fig. S2** Cyclic performance of Li-S batteries at 1C in TEP/FEC with different FEC contents.

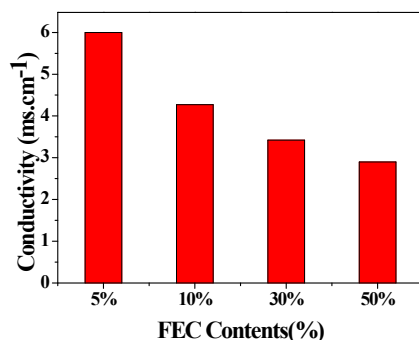

**Fig. S3** Ionic conductivity tests of the TEP-based electrolytes with different FEC contents

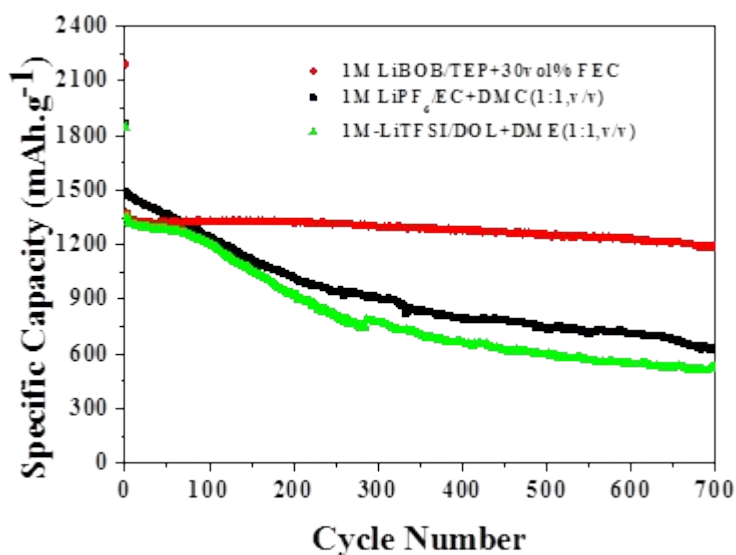

**Fig. S4:** Cycling performances of sulfur composite cathodes in the common electrolytes using in lithium sulfur batteries.

Notes: The common carbonated electrolyte is 1mol/L LiPF<sub>6</sub>/EC-DMC (1:1, v/v), ether electrolyte with LiNO<sub>3</sub> stands for 1mol/L LiTFSI/DOL-DME (1:1, v/v)+1 wt% LiNO<sub>3</sub>. The comparison test were conducted in Li-S batteries with S@pPAN cathode. The rapid decline of capacity in ester electrolyte could attributed to the discharge product polysulfide dissolution, which reduces active material in current collector and causes “shuttle phenomenon”.

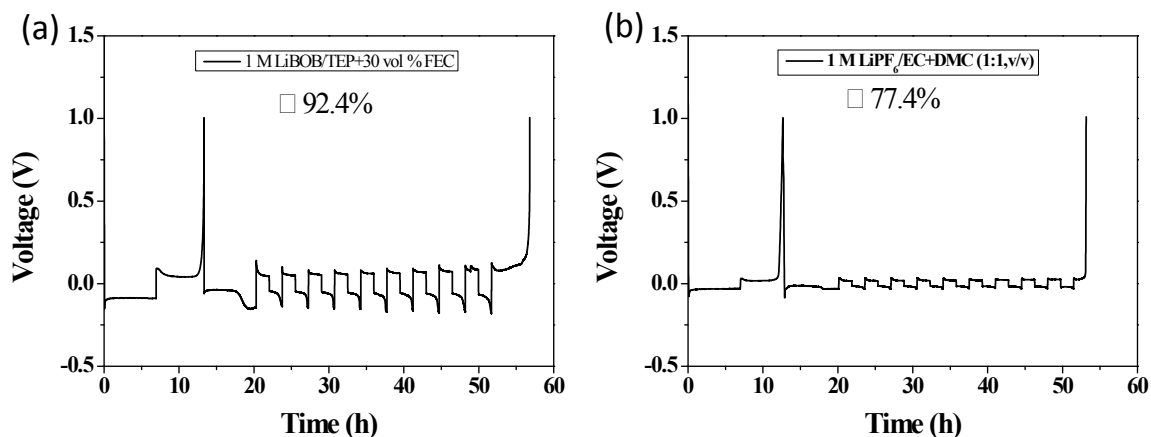

**Fig. S5** Coulombic efficiency test of (a) LiBOB/TEP electrolyte; (b) standard carbonate electrolyte.

Note: Li anode CE was measured using a reported protocol to remove the influence of current collector.<sup>2, 3</sup> After common Li-Cu cell assembled and rest, a Li film ( $5 \text{ C cm}^{-2}$ ) was first deposited onto the Cu foil and then fully stripped. Another Li film ( $5 \text{ C cm}^{-2}$ ) was deposited again, but only 25% of the Li film ( $1.25 \text{ C cm}^{-2}$ ) was stripped and deposited for 10 cycles. Finally, the Li film was fully stripped off at a cutoff voltage of 1V. The current density during test was  $0.2 \text{ mA cm}^{-2}$ . Experimental electrolyte and control electrolyte was test by this method. The average CE was calculated as the equation blew.

$$\text{Coulombic efficiency} = (n \times Q_r + Q_{s, \text{final}}) / (Q_{d, 2^{\text{nd}}} + n \times Q_r) \times 100\%$$

Where the n is the cycle number,  $Q_r = 1.25 \text{ C cm}^{-2}$ ,  $Q_{d, 2^{\text{nd}}} = 5 \text{ C cm}^{-2}$ ,  $Q_{s, \text{final}}$  is the charge during the final stripping. The CE of LiBOB/TEP electrolyte is 92.4%, much higher than the 77.4% in standard electrolyte.

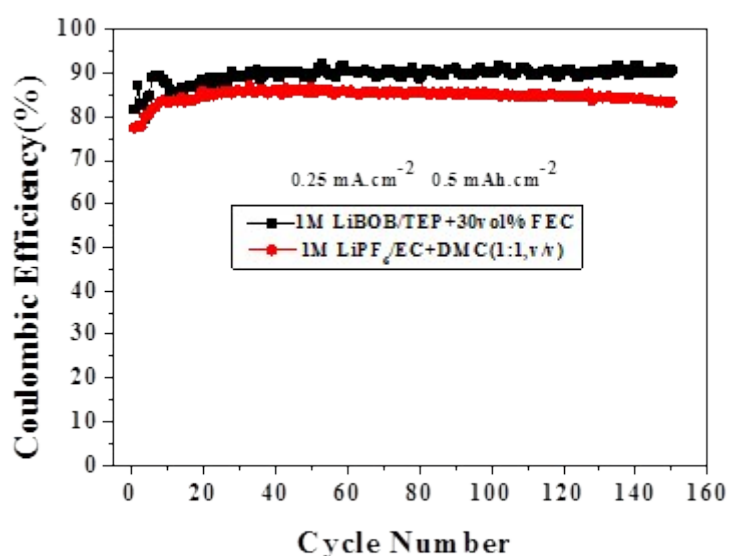

**Fig. S6** Li anode stability using Li-Cu cell plating/stripping method in (a) LiBOB/TEP electrolyte; (b) standard carbonate electrolyte.

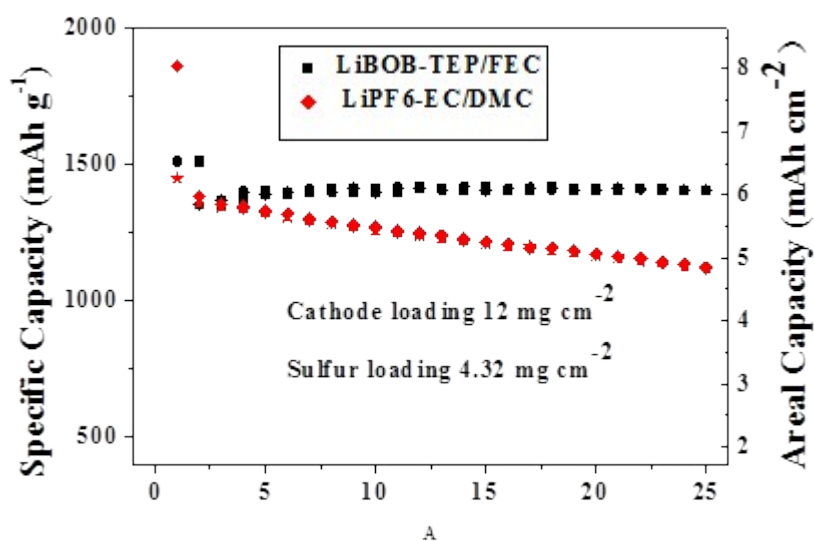

**Fig. S7** High cathode loading cyclic performance comparison of LiBOB/TEP electrolyte and standard electrolyte.

**Table S1:** The element contents on the S@pPAN cathode after 100 cycles in different electrolyte

| Elements              | Units: Mass Percent (%) |       |      |      |      |
|-----------------------|-------------------------|-------|------|------|------|
|                       | C 1s                    | O 1s  | F 1s | P 2p | B 1s |
| Standard electrolyte  | 49.95                   | 48.12 | 1.65 | 0.28 | --   |
| TEP-based electrolyte | 44.72                   | 44.29 | 6.27 | 0.98 | 3.75 |

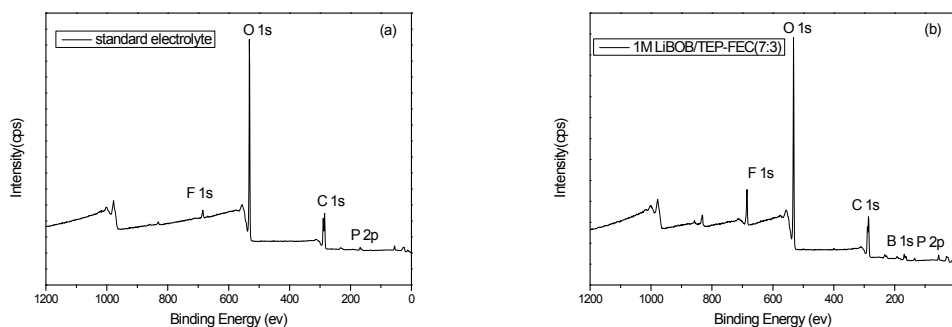

**Fig. S8:** Full spectra of the S@pPAN cathodes after 100 cycles at different electrolyte. (a) blank electrolyte; (b) TEP-based electrolyte.

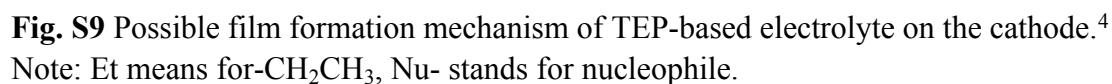

| Solvents | Molecular structure                                                                                                   | Melting point (°C) | Boiling point (°C) | Flash point (°C) | Dielectric constant | Viscosity (mPa,25°C) | Density (g.cm <sup>-3</sup> ) |
|----------|-----------------------------------------------------------------------------------------------------------------------|--------------------|--------------------|------------------|---------------------|----------------------|-------------------------------|
| EC       | 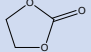<br>Ethylene carbonate               | 37                 | 128                | 160              | 90.4<br>(at 40°C)   | 1.93                 | 1.32                          |
| DMC      | 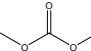<br>dimethyl carbonate               | 5                  | 90                 | 18               | 3.2                 | 0.59                 | 1.07                          |
| FEC      | 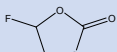<br>Fluoroethylene carbonate         | 18                 | 249                | 120              | 96.0                | 4.1                  | 1.45                          |
| TEP      | 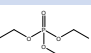<br>Triethyl phosphate             | -56                | 210-220            | 117              | 13.0                | 1.6                  | 1.07                          |
| DOL      | 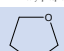<br>1,3-Dioxolane                  | -95                | 74-75              | -6               | 7.1                 | 0.6                  | 1.06                          |
| DME      | 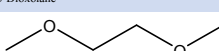<br>ethylene glycol dimethyl ether | -69                | 83                 | 1                | 7.3                 | 0.46                 | 0.86                          |

**Table S3: some reported safe electrolyte for Li-S batteries**

| Electrolyte                 | Electrolyte component                                                                                     | Sulfur cathode               | Area loading (mg.cm <sup>-2</sup> ) | Cycling performance                              |                                                           | Remarkable performance                                                                                         | Ref.               |
|-----------------------------|-----------------------------------------------------------------------------------------------------------|------------------------------|-------------------------------------|--------------------------------------------------|-----------------------------------------------------------|----------------------------------------------------------------------------------------------------------------|--------------------|
|                             |                                                                                                           |                              |                                     | Initial discharge capacity(mAh.g <sup>-1</sup> ) | After cycling                                             |                                                                                                                |                    |
| Ionic liquid electrolyte    | 1M LiTFSI-PP13TFSI-DOL-DME(2:1:1)<br>0.2M LiNO <sub>3</sub>                                               | S:C=6:4                      | 3.0                                 | 980                                              | 500 mAh g <sup>-1</sup> after 100 cycles at 0.5C          | zero self discharge                                                                                            | Ref. <sup>6</sup>  |
|                             | 1M-LiTFSI-DOL-DME-Py14TFSI                                                                                | S:C=8:2                      | 1-1.5                               | 700                                              | 94.3% retention after 120 cycles at 0.1C                  | Lithium surface modification                                                                                   | Ref. <sup>7</sup>  |
|                             | 0.5 M-LiTFSI-P1A3TFSI                                                                                     | S/C composites               | /                                   | 1457                                             | 670 mAh g <sup>-1</sup> after 50 cycles at 0.1C           | prelithiated Si/C anode                                                                                        | Ref. <sup>8</sup>  |
| Inorganic solid electrolyte | Li <sub>1.5</sub> Al <sub>0.5</sub> Ge <sub>1.5</sub> (PO <sub>4</sub> ) <sub>3</sub> – PEO-LiTFSI-PEGDME | S:C=8:2                      | 1.0                                 | 725                                              | 700 mA h g <sup>-1</sup> after 300 cycles at 0.5C         | almost no self-discharge                                                                                       | Ref. <sup>9</sup>  |
|                             | MoS <sub>2</sub> -doped Li <sub>2</sub> S-P <sub>2</sub> S <sub>5</sub> glass ceramic electrolyte         | S:C=75:25                    | /                                   | 1020                                             | 425 mA h g <sup>-1</sup> after 30 cycles at 0.05C         | a high ionic conductivity of 4.8 mS cm <sup>-1</sup> at room temperature                                       | Ref. <sup>10</sup> |
| Polymer electrolyte         | (PMImTFSI)-based hybrid gel polymer electrolyte (ILGPE)                                                   | S:C=6:4                      | /                                   | 1029                                             | 885 mA h g <sup>-1</sup> after 30 cycles at 0.1C          | 1.1×10 <sup>-3</sup> S cm <sup>-1</sup> at 20 °C.                                                              | Ref. <sup>11</sup> |
|                             | starch hosted electrolyte/LiTFSI                                                                          | S:C=43:57                    | /                                   | 1442 mA h g <sup>-1</sup>                        | 562 ± 118 mA h g <sup>-1</sup> at 0.5 C after 1000 cycles | ionic conductivity 3.39 × 10 <sup>-4</sup> S cm <sup>-1</sup><br>lithium ion transference number 0.80 at 25 °C | Ref. <sup>12</sup> |
| Inflammabl<br>e additive    | LiPF <sub>6</sub> /EC-DMC-TTFP                                                                            | S@pPAN<br>43wt%<br>Sulfur    | 1.0                                 | 1450 reversible capacity                         | 1000 mAh g <sup>-1</sup> after 666cycles                  | Inflammability inhibiting and good rate performance                                                            | Ref. <sup>13</sup> |
|                             | LiPF <sub>6</sub> /EC-DMC-DMMP                                                                            | S@pPAN<br>50 wt%<br>Sulfur   | 0.5-2                               | 1400 reversible capacity                         | Capacity stable in 50 cycles                              | /                                                                                                              | Ref. <sup>14</sup> |
|                             | LiPF <sub>6</sub> /EC-DMC-TPPi                                                                            | S@pPAN<br>43 wt%<br>Sulfur   | /                                   | 1380 reversible capacity                         | 94.2% capacity retention after 45 cycles                  | Thermal stability                                                                                              | Ref. <sup>15</sup> |
| This work                   | 1M LiBOB /TEP+FEC (7:3, v/v)                                                                              | S@pPAN<br>41.3 wt%<br>Sulfur | 1.0                                 | 1377 reversible capacity                         | 1257 mAh g <sup>-1</sup> after 500 cycles at 1C           | High capacity retention 91.3% after 500 cycles at 1C and totally inflammable                                   |                    |

Table S3 collected some representative works on safe electrolyte for Li-S batteries from four groups, namely ionic liquid electrolyte, inorganic solid electrolyte, polymer electrolyte and inflammable additive into standard liquid electrolyte. The four types electrolyte are inflammable and highly-safe for Li-S batteries.

## Reference

1. J. Wang, Z. Yao, C. W. Monroe, J. Yang and Y. Nuli, *Adv. Funct. Mater.*, 2013, 23, 1194-1201.
2. X. Ren, Y. Zhang, M. H. Engelhard, Q. Li, J.-G. Zhang and W. Xu, *ACS Energy Lett.*, 2017, DOI: 10.1021/acsenergylett.7b00982, 14-19.
3. F. Ding, W. Xu, G. L. Graff, J. Zhang, M. L. Sushko, X. Chen, Y. Shao, M. H. Engelhard, Z. Nie, J. Xiao, X. Liu, P. V. Sushko, J. Liu and J. G. Zhang, *J. Am. Chem. Soc.*, 2013, 135, 4450-4456.
4. K. Matsumoto, M. Martinez, T. Gutel, S. Mailley, E. De Vito, S. Patoux, K. Inoue and K. Utsugi, *J. Power Sources*, 2015, 273, 1084-1088.
5. K. Xu, *Chemical Reviews*, 2004, 104, 4303-4417.
6. L. Wang, J. Liu, S. Yuan, Y. Wang and Y. Xia, *Energy & Environmental Science*, 2016, 9, 224-231.
7. J. Zheng, M. Gu, H. Chen, P. Meduri, M. H. Engelhard, J.-G. Zhang, J. Liu and J. Xiao, *Journal of Materials Chemistry A*, 2013, 1, 8464-8470.
8. Y. Yan, Y.-X. Yin, S. Xin, J. Su, Y.-G. Guo and L.-J. Wan, *Electrochimica Acta*, 2013, 91, 58-61.
9. Q. Wang, Z. Wen, J. Jin, J. Guo, X. Huang, J. Yang and C. Chen, *Chemical communications*, 2016, 52, 1637-1640.
10. C. Wang, Y. Gong, B. Liu, K. Fu, Y. Yao, E. Hitz, Y. Li, J. Dai, S. Xu, W. Luo, E. D. Wachsman and L. Hu, *Nano lett.*, 2017, 17, 565-571.
11. J.-K. Kim, *Materials Letters*, 2017, 187, 40-43.
12. Y. Lin, J. Li, K. Liu, Y. Liu, J. Liu and X. Wang, *Green Chemistry*, 2016, 18, 3796-3803.
13. J. Wang, F. Lin, H. Jia, J. Yang, C. W. Monroe and Y. NuLi, *Angew. Chem.*, 2014, 53, 10099-10104.
14. F. Lin, J. Wang, H. Jia, C. W. Monroe, J. Yang and Y. NuLi, *J. Power Sources*, 2013, 223, 18-22.
15. H. Jia, J. Wang, F. Lin, C. W. Monroe, J. Yang and Y. NuLi, *Chem. Commun.*, 2014, 50, 7011-7013.
